# Supplementary material for: Gene expression analyses of primary melanomas reveal CTHRC1 as an important player in melanoma progression
Source: PubMed Central journal article supplement (PMC4924771; doi:10.18632/oncotarget.7604), 2016-02-23
Supplement: oncotarget-07-15065-s001.pdf [file oncotarget-07-15065-s001.pdf]

SUPPLEMENTARY FIGURES AND TABLES

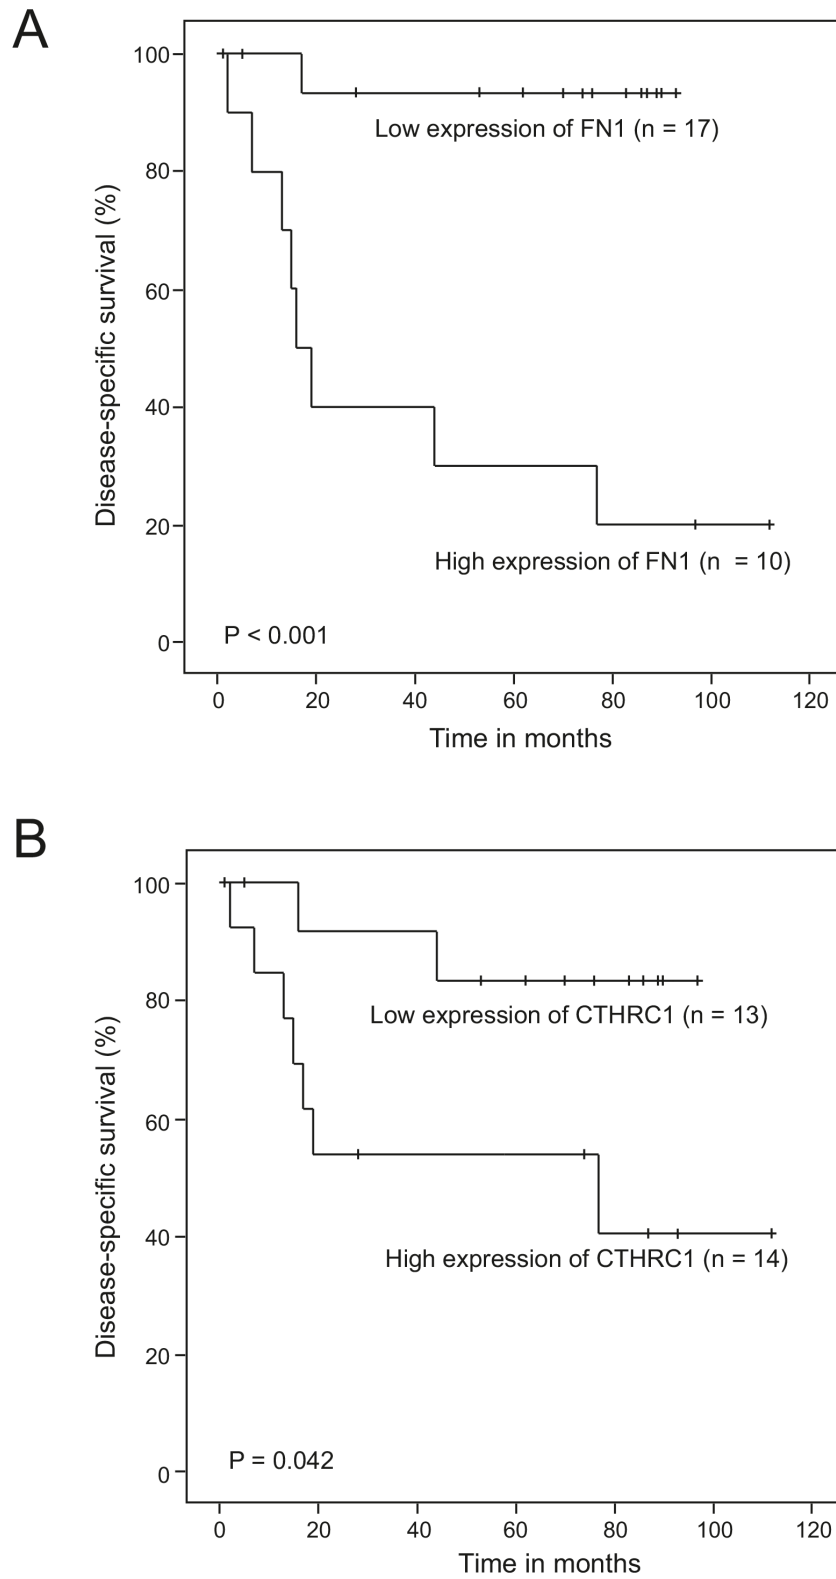

**Supplementary Figure S1: The prognostic values of FN1 and CTHRC1 expression in primary melanomas. A–B.** Kaplan-Meier survival curves for patient groups with primary melanomas showing low and high FN1 (A) and CTHRC1 (B) mRNA expression.

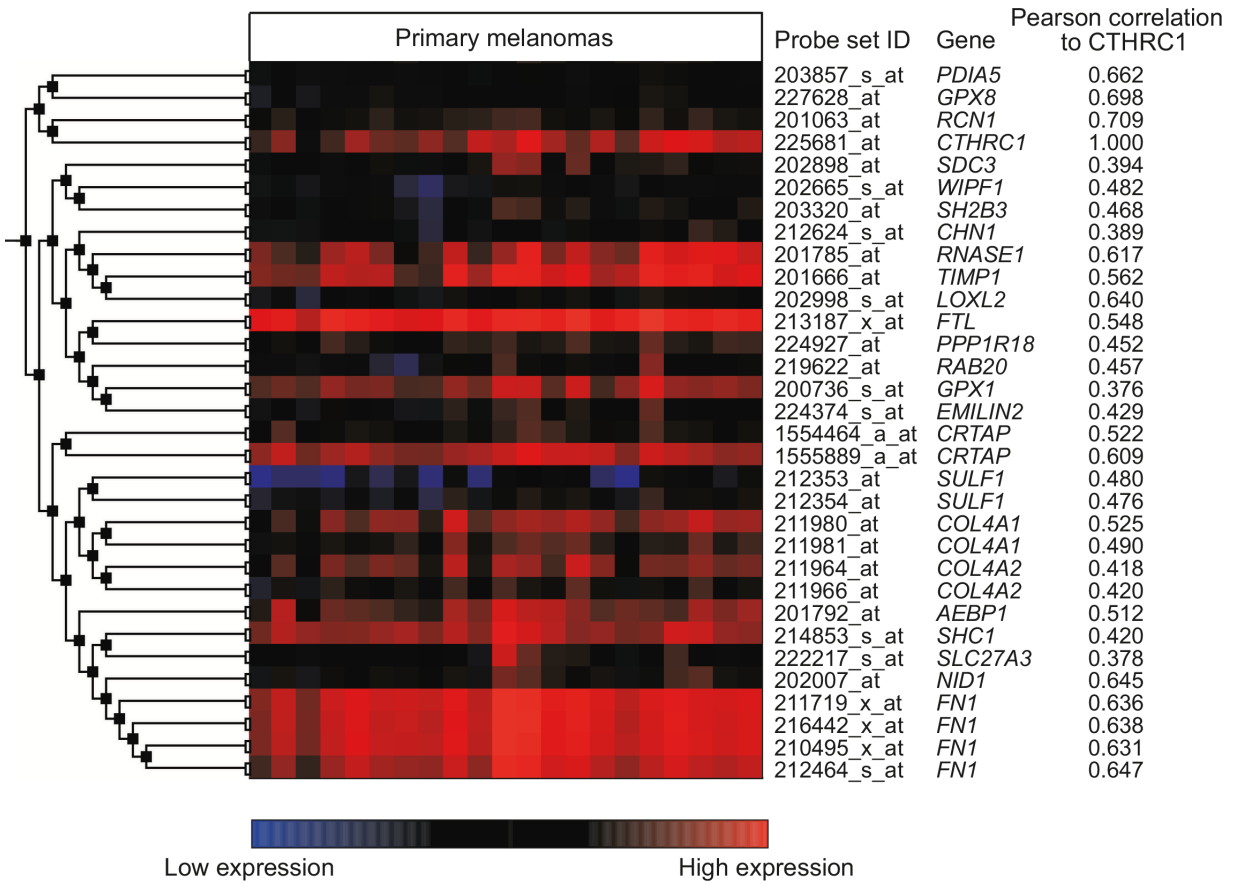

**Supplementary Figure S2: Genes expressed coordinately with CTHRC1 in primary melanomas.** Genes with a <100 mean difference and a <1.5 fold-change between benign nevi and primary melanomas were filtered off. The remaining 2981 probe sets were analyzed by hierarchical gene clustering in 21 primary melanomas.

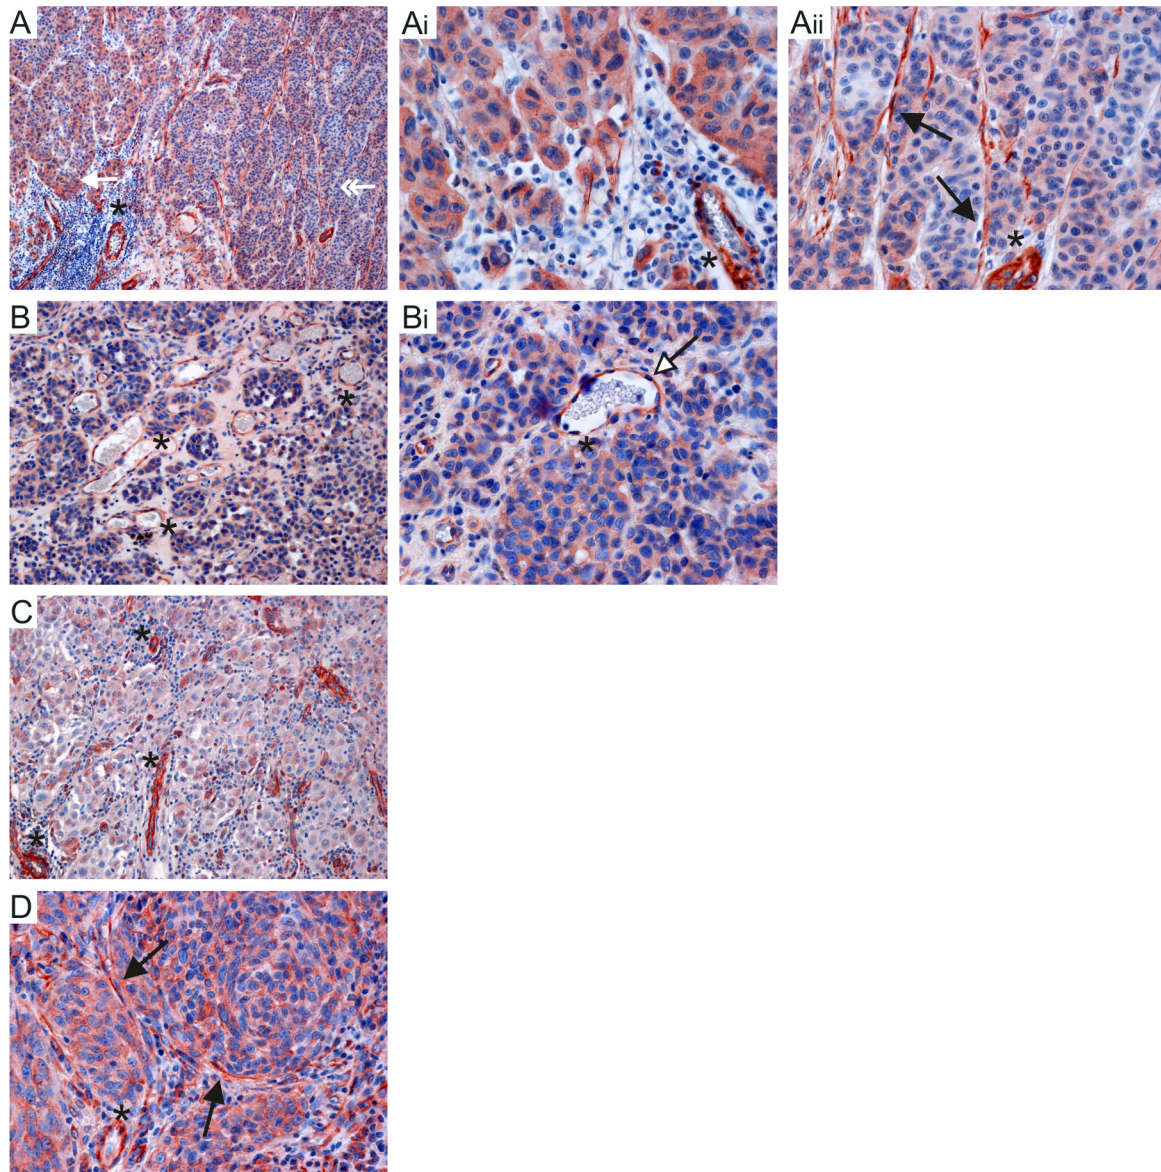

**Supplementary Figure S3: Immunohistochemical staining of CTHRC1 in primary melanomas.** A–D. Primary melanomas showing CTHRC1 staining in melanoma cells, fibroblasts, and/or blood vessels. Panels Ai. and Aii. are magnifications of the areas marked with a white arrow and a white double-headed arrow in panel (A), respectively. Panel Bi. shows a magnification of a blood vessel from a primary melanoma presented in panel B. Note the CTHRC1 staining in endothelial cells in (Bi); marked with a white-headed arrow. Examples of fibroblasts are marked with black arrows and blood vessels with asterisks. Original magnification 100x (A), 200x (B, C), 400x (Ai, Aii, Bi, D).

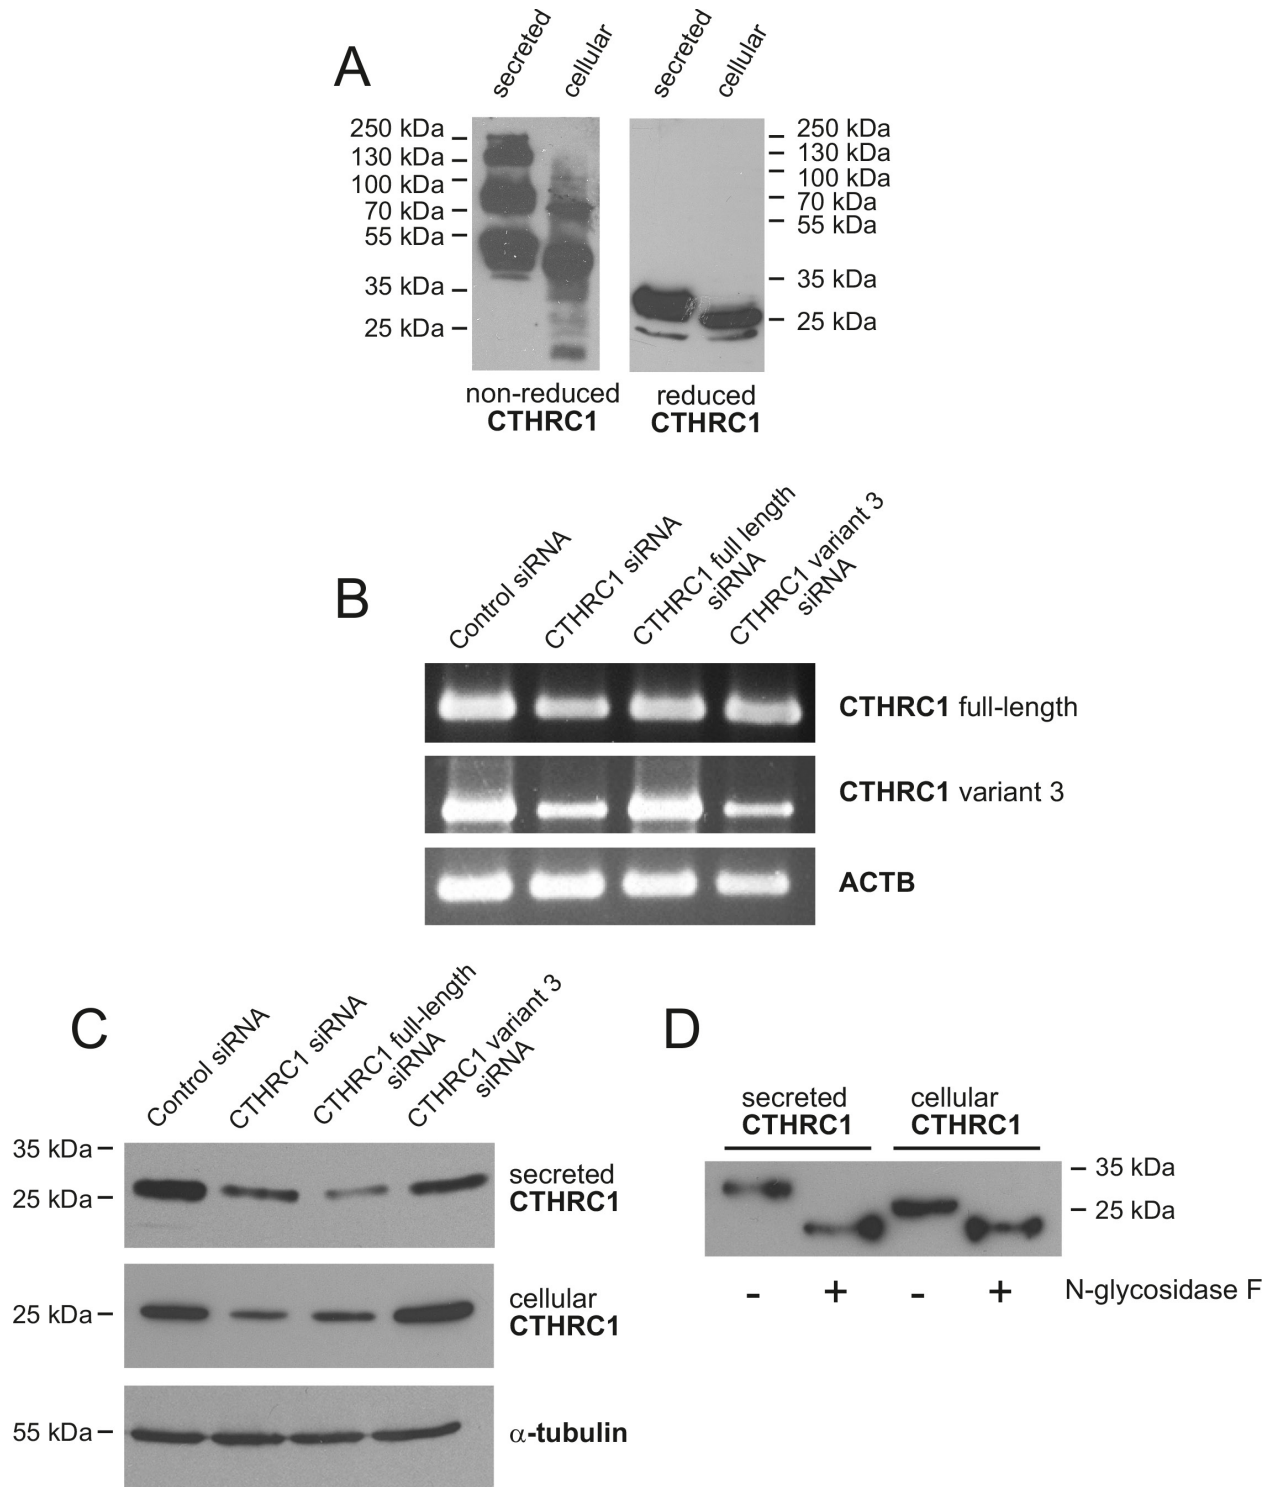

**Supplementary Figure S4: Characterization of the secreted and cellular CTHRC1 protein.** **A.** Western blot analysis of CTHRC1 in the conditioned media and cellular lysate of WM239 melanoma cells under non-reducing and reducing conditions. **B.** Expression of full-length and variant CTHRC1 mRNA in WM239 control and CTHRC1-knockdown cells as analyzed by semi-quantitative RT-PCR. Actin (ACTB) was used as a control. **C.** Western blot analysis of CTHRC1 in the conditioned media and cellular lysates of WM239 control and CTHRC1-knockdown cells. Alpha-tubulin was used as a loading control. **D.** Western blot analysis of CTHRC1 in the conditioned media and cellular lysate of WM239 cells with and without N-glycosidase F-treatment.

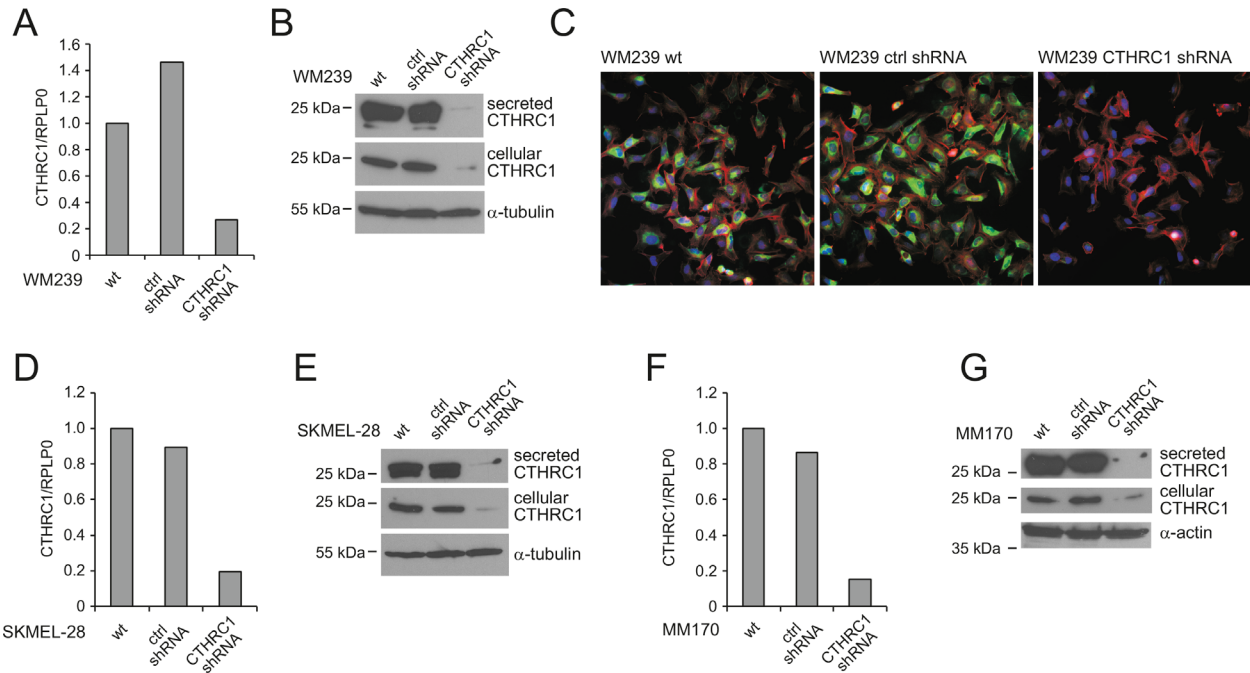

**Supplementary Figure S5: CTHRC1 down-regulation in CTHRC1-knockdown cells.** Relative CTHRC1 mRNA levels in WM239 **A**, SKMEL-28 **D**, and MM170 **F**, wild-type (wt) cells and cells transduced with lentiviral control (ctrl) shRNAs or shRNAs targeting CTHRC1. CTHRC1 and RPLP0 cDNA levels were measured by qRT-PCR in triplicate for each sample. Western blot analysis of CTHRC1 in the conditioned media and cellular lysates of WM239 **B**, SKMEL-28 **E**, and MM170 **G**, wild-type cells and cells transduced with lentiviral control shRNAs or shRNAs targeting CTHRC1. Alpha-tubulin or alpha-actin was used as a loading control. **C**, Immunofluorescence staining of CTHRC1 in WM239 wild-type, control shRNA, and CTHRC1-knockdown cells. CTHRC1 is seen in green, F-actin in red, and the nuclei (DAPI) in blue. Original magnification x200.

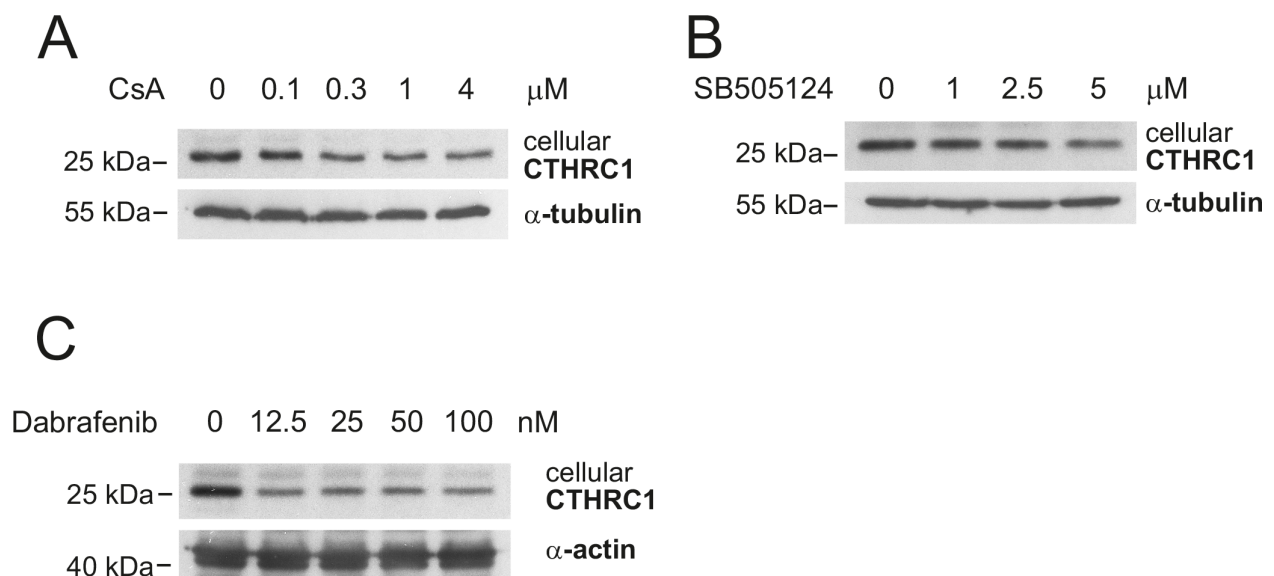

**Supplementary Figure S6: Regulation of CTHRC1 expression.** **A**, Western blot analysis of CTHRC1 in MM170 cells treated without or with increasing concentrations of cyclosporin A (CsA) for 24 hours (**A**) **B-C**, TGF $\beta$ -receptor I/ALK-5 inhibitor SB505124 for 48 hours (**B**) and BRAF inhibitor Dabrafenib for 24 hours (**C**). Alpha-tubulin or alpha-actin were used as a loading control.

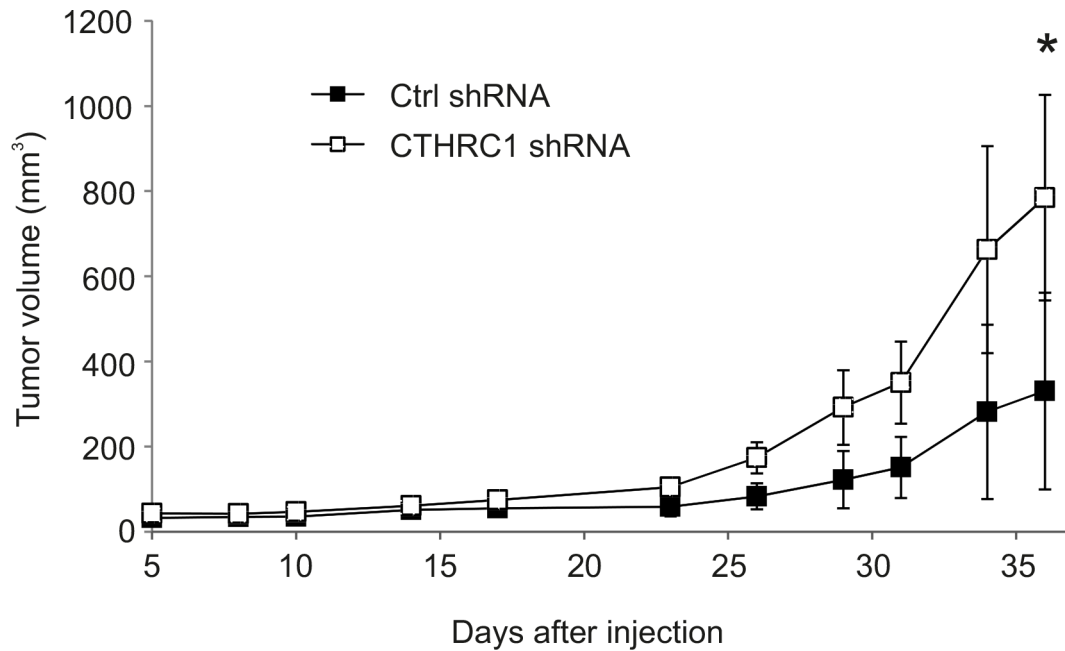

**Supplementary Figure S7: Growth curves of tumors induced by control (ctrl) shRNA-expressing and CTHRC1-knockdown WM239 cells in nude mice.** Cells ( $6 \times 10^6$ ) were mixed with Matrigel and injected subcutaneously into the lower flank of the individual mice (six mice per group). Tumor volume was measured with a caliper two to three times per week. Bars represent standard deviations. \* $P < 0.01$ .

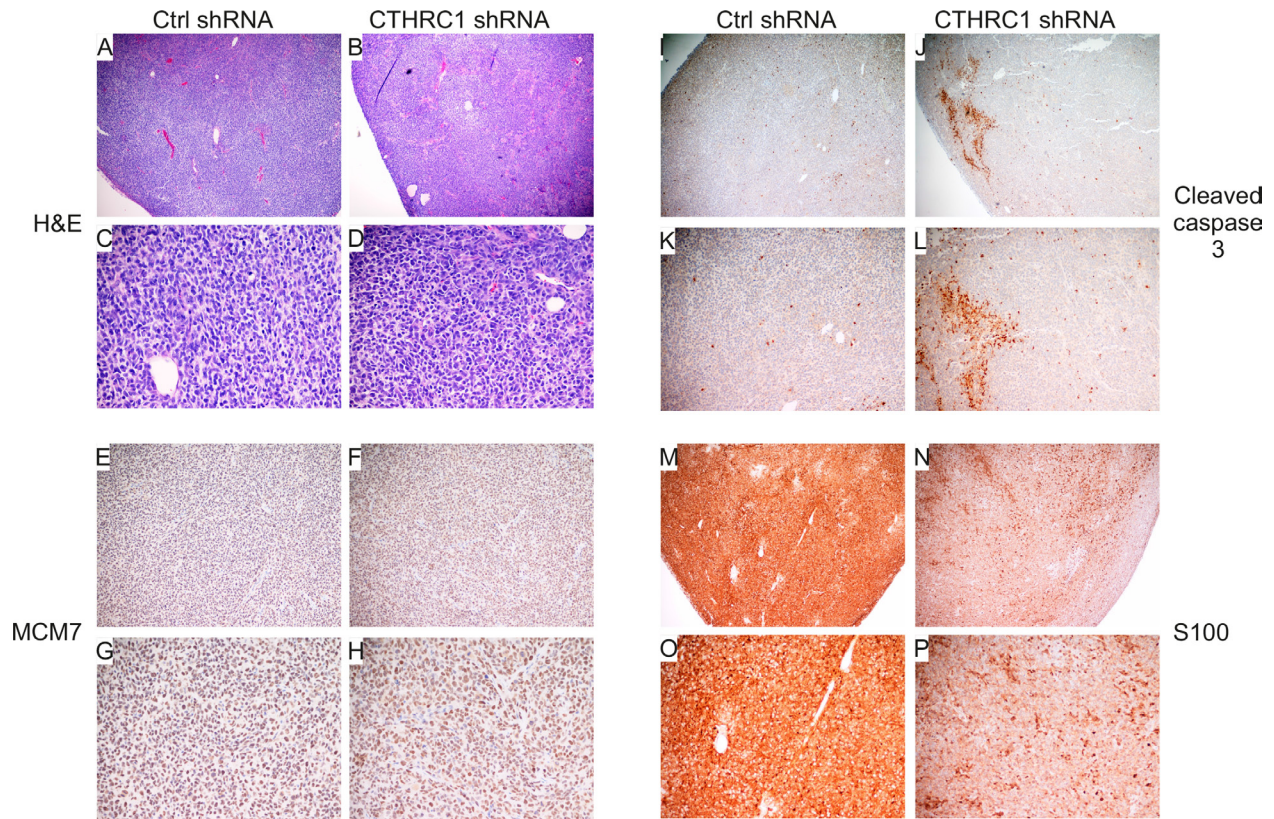

**Supplementary Figure S8: Histochemical analysis of tumors induced by control (ctrl) shRNA-expressing and CTHRC1-knockdown WM239 cells in nude mice.** A–D. Representative H&E stainings of control (A and C) and CTHRC1-knockdown tumors (B and D). E–P. Representative immunohistochemical stainings of MCM7 in control (E and G) and CTHRC1-knockdown tumors (F and H), cleaved caspase 3 in control (I and K) and CTHRC1-knockdown tumors (J and L), and S100 in control (M and O) and CTHRC1-knockdown tumors (N and P). (E–P) Positive immunostaining is shown in brown (DAB). Original magnification 40x (A, B, I, J, M, N), 100x (E, F, K, L, O, P), 200x (C, D, G, H).

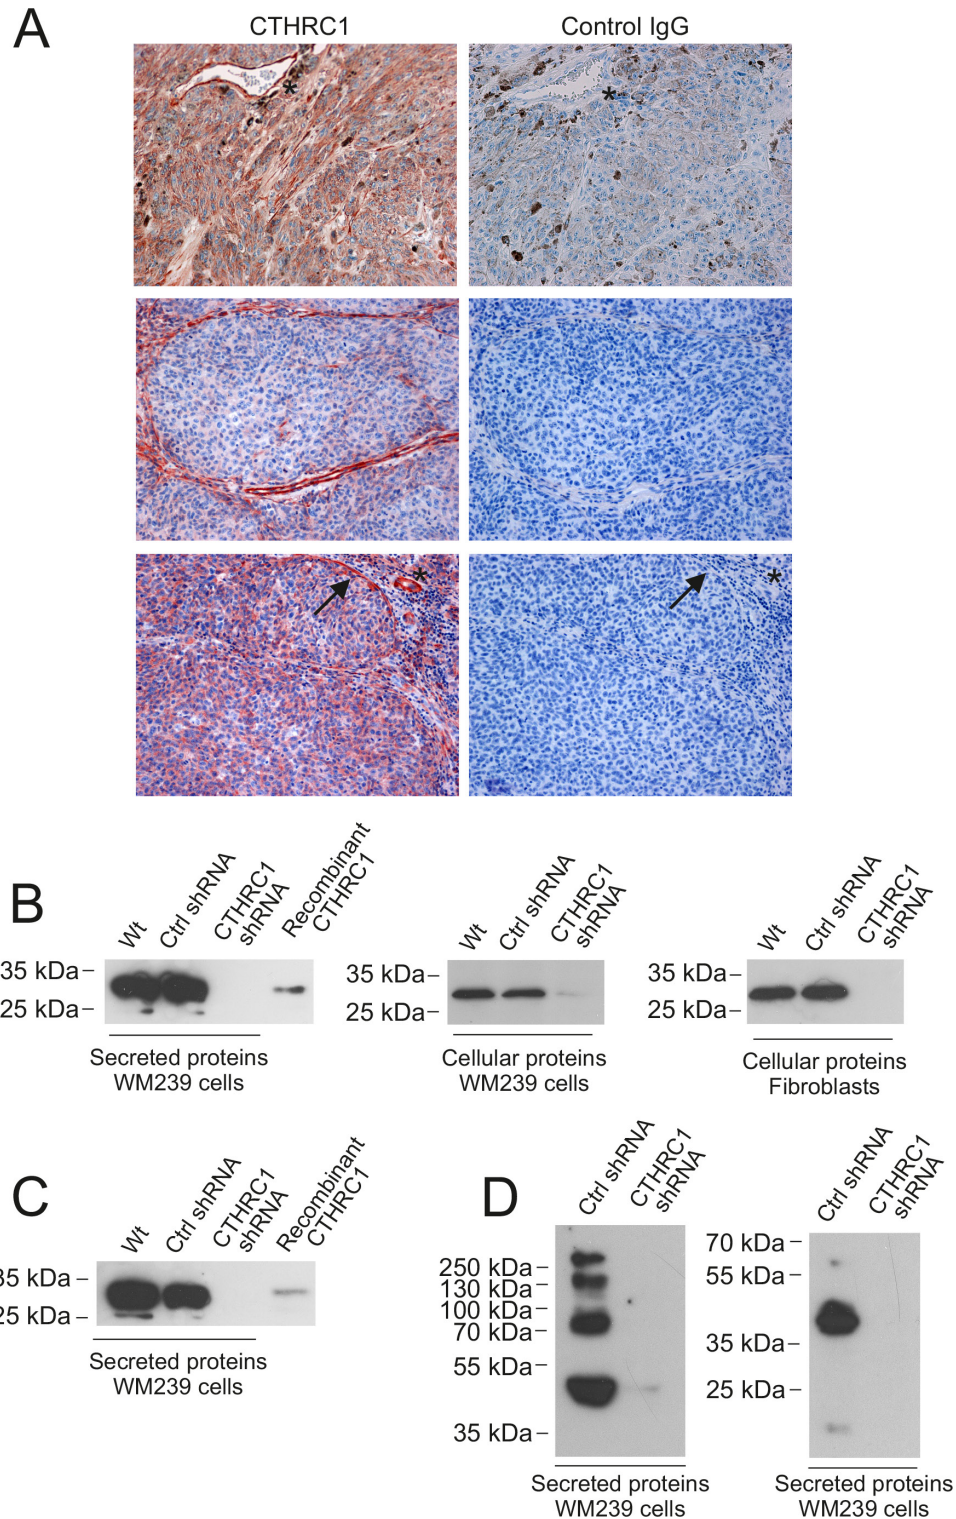

**Supplementary Figure S9: Specificity of the CTHRC1 antibodies in immunohistochemical and western blotting analyses.**

**A.** Consecutive sections from the same primary melanomas stained with the Genetex antibody recognizing CTHRC1 and with a normal rabbit IgG control antibody. Positive immunostaining is shown in red (AEC). Original magnification 200x. Examples of fibroblasts are marked with arrows and blood vessels with asterisks. **B–D.** Western blot analysis of recombinant CTHRC1 protein as well as CTHRC1 in the conditioned media and/or cellular lysates of wild-type (wt), control (ctrl) and CTHRC1-knockdown WM239 melanoma cells and/or fibroblasts using the rabbit polyclonal antibodies from Genetex (N2C3) (B) Abcam (ab85739) (C) and Sino Biological (11647-RP02; non-reduced) (D).



**Supplementary Table S1: Overexpressed genes ( $\geq 4$ -fold shown in bold) in primary melanomas compared to benign nevi by Significance Analysis of Microarrays (SAM)**

See Supplementary File 1

**Supplementary Table S2: Underexpressed genes in primary melanomas compared to benign nevi by Significance Analysis of Microarrays (SAM)**

See Supplementary File 2

**Supplementary Table S3: Overexpressed genes in metastatic compared to non-metastatic primary melanomas by Significance Analysis of Microarrays (SAM)**

See Supplementary File 3

**Supplementary Table S4: Underexpressed genes in metastatic compared to non-metastatic primary melanomas by Significance Analysis of Microarrays (SAM)**

See Supplementary File 4

**Supplementary Table S5: Genes correlating with CTHRC1 expression both in our panel of primary cells and cell lines as well as in a panel of 34 melanoma cell lines obtained from a data bank**

| Gene          | Gene description                                                          | Probe set ID | Pearson correlation          |                          |
|---------------|---------------------------------------------------------------------------|--------------|------------------------------|--------------------------|
|               |                                                                           |              | Primary cells and cell lines | Cell lines (E-GEOD-7152) |
| <i>CTHRC1</i> | Collagen triple helix repeat containing 1                                 | 225681_at    | 1.000                        | 1.000                    |
| <i>FNI</i>    | Fibronectin 1                                                             | 211719_x_at  | 0.944                        | 0.802                    |
| <i>FNI</i>    | Fibronectin 1                                                             | 216442_x_at  | 0.943                        | 0.790                    |
| <i>FNI</i>    | Fibronectin 1                                                             | 210495_x_at  | 0.938                        | 0.794                    |
| <i>FNI</i>    | Fibronectin 1                                                             | 212464_s_at  | 0.921                        | 0.797                    |
| <i>GPR126</i> | G protein-coupled receptor 126                                            | 213094_at    | 0.881                        | 0.655                    |
| <i>FNI</i>    | Fibronectin 1                                                             | 214701_s_at  | 0.854                        | 0.658                    |
| <i>NFATC2</i> | Nuclear factor of activated T-cells, cytoplasmic, calcineurin-dependent 2 | 228442_at    | 0.822                        | 0.662                    |
| <i>NFATC2</i> | Nuclear factor of activated T-cells, cytoplasmic, calcineurin-dependent 2 | 226991_at    | 0.803                        | 0.645                    |
| <i>ITGB3</i>  | Integrin, beta 3 (platelet glycoprotein IIIa, antigen CD61)               | 204627_s_at  | 0.785                        | 0.604                    |

Supplementary Table S6: Genes downregulated in WM239 melanoma cells after knockdown of CTHRC1

| Gene                           | Gene description                                                                        | Probe set ID | Signal WM239 cells |              | Fold                    |
|--------------------------------|-----------------------------------------------------------------------------------------|--------------|--------------------|--------------|-------------------------|
|                                |                                                                                         |              | Control shRNA      | CTHRC1 shRNA | Control vs CTHRC1 shRNA |
| <i>CTHRC1</i>                  | Collagen triple helix repeat containing 1                                               | 225681_at    | 9375               | 3349         | 2.8                     |
| <i>AKR1C3</i>                  | Aldo-keto reductase family 1, member C3                                                 | 209160_at    | 183                | 72           | 2.5                     |
| <i>RGS2</i>                    | Regulator of G-protein signaling 2, 24kDa                                               | 202388_at    | 1467               | 709          | 2.1                     |
| <i>SLC7A11</i>                 | Solute carrier family 7, member 11                                                      | 217678_at    | 1050               | 513          | 2.0                     |
| <i>GHITM</i>                   | Growth hormone inducible transmembrane protein                                          | 209248_at    | 1222               | 619          | 2.0                     |
| <i>TMF1</i>                    | TATA element modulatory factor 1                                                        | 214948_s_at  | 1341               | 703          | 1.9                     |
| <i>ISCA1</i>                   | Iron-sulfur cluster assembly 1 homolog                                                  | 209274_s_at  | 587                | 322          | 1.8                     |
| <i>SPANXC/SPANXE</i>           | SPANX family, member C/<br>SPANX family, member E                                       | 220217_x_at  | 451                | 248          | 1.8                     |
| <i>FABP7</i>                   | Fatty acid binding protein 7, brain                                                     | 205029_s_at  | 688                | 379          | 1.8                     |
| <i>HS3ST3A1</i>                | Heparan sulfate (glucosamine) 3-O-sulfotransferase 3A1                                  | 219985_at    | 248                | 137          | 1.8                     |
| <i>SPANXA1/A2/B1/B2/C/E/F1</i> | Sperm protein associated with the nucleus, X-linked, family member A1/ A2/B1/ B2/C/E/F1 | 220922_s_at  | 514                | 284          | 1.8                     |
| <i>UG0898H09</i>               | Uncharacterized LOC643763                                                               | 1558388_a_at | 248                | 140          | 1.8                     |
| <i>PRKCI</i>                   | Protein kinase C, iota                                                                  | 213518_at    | 594                | 337          | 1.8                     |
| <i>CISD2</i>                   | CDGSH iron sulfur domain 2                                                              | 226686_at    | 297                | 175          | 1.7                     |
| <i>PREPL</i>                   | Prolyl endopeptidase-like                                                               | 212215_at    | 449                | 267          | 1.7                     |
| <i>MYL12A</i>                  | Myosin, light chain 12A, regulatory, non-sarcomeric                                     | 201319_at    | 1690               | 1017         | 1.7                     |
| <i>TMX1</i>                    | Thioredoxin-related transmembrane protein 1                                             | 208097_s_at  | 1289               | 789          | 1.6                     |
| <i>WNT5A</i>                   | Wingless-type MMTV integration site family, member 5A                                   | 205990_s_at  | 472                | 289          | 1.6                     |
| <i>ARHGDIB</i>                 | Rho GDP dissociation inhibitor (GDI) beta                                               | 201288_at    | 400                | 246          | 1.6                     |

(Continued)

| Gene            | Gene description                                                          | Probe set ID | Signal WM239 cells |              | Fold                    |
|-----------------|---------------------------------------------------------------------------|--------------|--------------------|--------------|-------------------------|
|                 |                                                                           |              | Control shRNA      | CTHRC1 shRNA | Control vs CTHRC1 shRNA |
| <i>EXOC5</i>    | Exocyst complex component 5                                               | 228418_at    | 566                | 350          | 1.6                     |
| <i>TMEM9B</i>   | TMEM9 domain family, member B                                             | 222507_s_at  | 432                | 269          | 1.6                     |
| <i>SATI</i>     | Spermidine/spermine N1-acetyltransferase 1                                | 203455_s_at  | 410                | 256          | 1.6                     |
| <i>TSPAN13</i>  | Tetraspanin 13                                                            | 217979_at    | 3346               | 2100         | 1.6                     |
| <i>KIAA1199</i> | KIAA1199                                                                  | 212942_s_at  | 1291               | 817          | 1.6                     |
| <i>RUNX2</i>    | Runt-related transcription factor 2                                       | 232231_at    | 342                | 218          | 1.6                     |
| <i>SLC6A6</i>   | Solute carrier family 6 (neurotransmitter transporter, taurine), member 6 | 228754_at    | 1117               | 712          | 1.6                     |
| <i>MGP</i>      | Matrix Gla protein                                                        | 202291_s_at  | 498                | 317          | 1.6                     |
| <i>MRGPRX3</i>  | MAS-related GPR, member X3                                                | 1553293_at   | 999                | 639          | 1.6                     |
| <i>CFL1</i>     | Cofilin 1 (non-muscle)                                                    | 1555730_a_at | 816                | 527          | 1.5                     |
| <i>CALD1</i>    | Caldesmon 1                                                               | 201617_x_at  | 1234               | 806          | 1.5                     |
| <i>IRS1</i>     | Insulin receptor substrate 1                                              | 204686_at    | 293                | 192          | 1.5                     |
| <i>MESDC2</i>   | Mesoderm development candidate 2                                          | 224675_at    | 1246               | 820          | 1.5                     |
| <i>SEPT11</i>   | Septin 11                                                                 | 201307_at    | 576                | 380          | 1.5                     |
| <i>STIP1</i>    | Stress-induced-phosphoprotein 1                                           | 212009_s_at  | 537                | 356          | 1.5                     |
| <i>Clorf95</i>  | Chromosome 16 open reading frame 95                                       | 219785_s_at  | 435                | 289          | 1.5                     |
| <i>ENO1</i>     | Enolase 1, (alpha)                                                        | 217294_s_at  | 4517               | 3000         | 1.5                     |

**Supplementary Table S7: Changes in mRNA expression levels of selected genes in control and CTHRC1-knockdown cells analyzed by qRT-PCR**

| Gene          | Gene description                                      | WM239 <sup>a</sup> | WM239 <sup>b</sup> | Fold                    |                    |
|---------------|-------------------------------------------------------|--------------------|--------------------|-------------------------|--------------------|
|               |                                                       |                    |                    | control vs CTHRC1 shRNA |                    |
|               |                                                       |                    |                    | MM170                   | MM170 <sup>b</sup> |
| <i>CTHRC1</i> | Collagen triple helix repeat containing 1             | 5.5                | 10.9               | 7.0                     | 12.0               |
| <i>AKRIC3</i> | Aldo-keto reductase family 1, member C3               | 2.5                | 6.7                | 6.2                     | 5.5                |
| <i>FABP7</i>  | Fatty acid binding protein 7, brain                   | 2.0                | 5.1                | 1.7                     | 1.4                |
| <i>WNT5A</i>  | Wingless-type MMTV integration site family, member 5A | 1.5                | 2.1                | 1.4                     | 2.0                |

<sup>a</sup>WM239 control and CTHRC1-knockdown cells also analyzed by microarrays, see Supplementary Table S6.

<sup>b</sup> WM239/MM170 control and CTHRC1-knockdown cells from a separate transfection experiment. Relative expression levels of genes were normalized to that of RPLP0.

**Supplementary Table S8: PCR variables**

| Gene                      | 1) | Sequence 5' to 3'          | 2) | 3) | Source                       |
|---------------------------|----|----------------------------|----|----|------------------------------|
| <i>ACTB</i>               | F  | GCTCGTCGTCGACAACGGCTC      | 55 | 20 | Invitrogen/Life Technologies |
|                           | R  | CAAACATGATCTGGGTCATCTTCTC  |    |    |                              |
| <i>CTHRC1</i> full-length | F  | AGCGCCTCTGAGATCCCCAA       | 59 | 24 | Park et al. 2013             |
|                           | R  | TGAACAAGTGCCAACCCAGA       |    |    |                              |
| variant 3                 | F  | AGAAGGTTTAAGGCCGAAAGGGA    | 57 | 35 | PrimerQuest                  |
|                           | R  | GTCATTTAAGTGAACCATTCCAAGGC |    |    |                              |
| <i>FNI</i> EDA domain     | F  | GGAGAGAGTCAGCCTCTGGTTCAG   | 56 | 25 | Palmieri et al. 1999         |
|                           | R  | TGTCCACTGGGCGCTCAGGCTTGTG  |    |    |                              |
| EDB domain                | F  | CGGCCTGGAGTACAATGTCAGTGT   | 56 | 25 | Palmieri et al. 1999         |
|                           | R  | CAGGTGACACGCATGGTGTCTGGA   |    |    |                              |
| <i>ITGB3</i>              | F  | GATGCATCCCCTTGCTGGTGTGTTT  | 56 | 23 | PrimerQuest                  |
|                           | R  | CATTGTTGAGGCAGGTGGCATTGA   |    |    |                              |
| <i>NFATC2</i>             | F  | AAGCCACGGTGGATAAGGACAAGA   | 56 | 25 | PrimerQuest                  |
|                           | R  | ACATGATGTGCTGGAACCTCTGGT   |    |    |                              |

1) Primer orientation, F=forward, R=reverse; 2) Annealing temperature (°C); 3) Number of PCR cycles.

Park EH, Kim S, Jo JY, Kim SJ, Hwang Y, Kim JM, Song SY, Lee DK, Koh SS: Collagen triple helix repeat containing-1 promotes pancreatic cancer progression by regulating migration and adhesion of tumor cells. *Carcinogenesis* 2013, 34:694-702.

Palmieri G, Strazzullo M, Ascierto PA, Satriano SM, Daponte A, Castello G: Polymerase chain reaction-based detection of circulating melanoma cells as an effective marker of tumor progression. *Melanoma Cooperative Group. J Clin Oncol* 1999, 17:304-311.
